# Supplementary material
Source: publisher site journal article supplement (https://www.dovepress.com/article/230195)
Supplement: Supplementary file 1 [file get_supplementary_file.php]

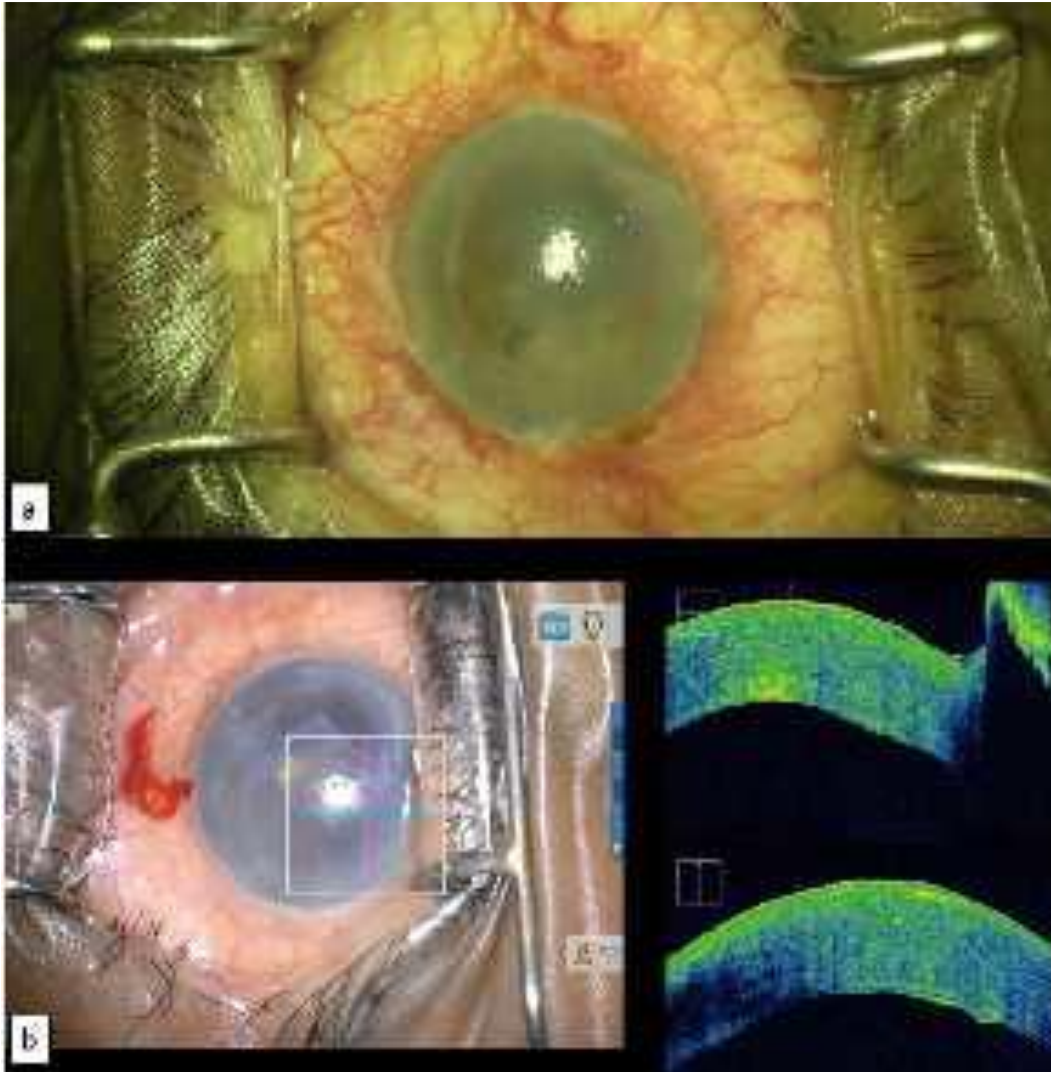

1

2 Figure S1 Clinical photograph of cases (a-b) with corneal decompensation with poor corneal  
3 visualization that underwent mi-OCT guided DMEK

4

Table S1 - Baseline Characteristic and Outcome of Cases Undergoing MI-OCT guided DMEK

| S.No | Age/<br>Sex | Primary<br>diagnosis                                       | Duration<br>of cornea<br>edema<br>(months) | Cause for<br>poor<br>visualizatio<br>n             | Pre-op<br>CDVA<br>(logMAR<br>) | Pre-<br>op<br>CCT<br>( $\mu$ m<br>) | Intra-op Mi-<br>OCT finding                                                                               | Post-<br>operative<br>Outcome             | Post-op<br>CDVA<br>(logMAR<br>) | Post<br>-op<br>CCT<br>( $\mu$ m) |
|------|-------------|------------------------------------------------------------|--------------------------------------------|----------------------------------------------------|--------------------------------|-------------------------------------|-----------------------------------------------------------------------------------------------------------|-------------------------------------------|---------------------------------|----------------------------------|
| 1    | 58/<br>M    | PBK                                                        | 24                                         | Severe<br>corneal<br>edema with<br>Stromal<br>haze | 1.77                           | 839                                 | Retained<br>DM tag                                                                                        | Rebubbling<br>for Graft<br>detachmen<br>t | 0.18                            | 560                              |
| 2    | 55/F        | PBK                                                        | 6                                          | Severe<br>corneal<br>edema                         | 2                              | 800                                 | Retained<br>DM tag                                                                                        | Graft<br>attached                         | 0                               | 550                              |
| 3    | 62/<br>M    | FECD with<br>pseudophakic<br>corneal<br>decompensat<br>ion | 12                                         | Severe<br>corneal<br>edema                         | 2                              | 910                                 | Retained<br>DM tag,<br>Orientation<br>of graft<br>when S<br>mark not<br>visible                           | Rebubbling<br>for graft<br>detachmen<br>t | 0.3                             | 540                              |
| 4    | 41/F        | PBK with IFC                                               | 24                                         | Severe<br>corneal<br>edema with<br>Stromal<br>haze | 2                              | 890                                 | Missing DM<br>noted,<br>Retained<br>DM tag,<br>Orientation<br>of graft<br>when S<br>mark not<br>visible   | Graft<br>attached                         | 1.3                             | 550                              |
| 5    | 68/F        | PBK                                                        | 12                                         | Severe<br>corneal<br>edema                         | 1                              | 820                                 | Retained<br>DM tag                                                                                        | Graft<br>attached                         | 0.18                            | 540                              |
| 6    | 54/F        | PBK                                                        | 12                                         | Stromal<br>haze                                    | 1.3                            | 710                                 | Retained<br>DM tag                                                                                        | Graft<br>attached                         | 0.3                             | 530                              |
| 7    | 51/F        | PBK                                                        | 10                                         | Severe<br>corneal<br>edema                         | 2                              | 980                                 | Retained<br>DM tag, S<br>mark not<br>visible, Graft<br>fold noted<br>(upward)-<br>successful<br>unfolding | Graft<br>attached                         | 0.3                             | 550                              |
| 8    | 60/F        | FECD with<br>pseudophakic<br>corneal<br>decompensat<br>ion | 8                                          | Stromal<br>haze                                    | 0.78                           | 642                                 | Retained<br>DM tag                                                                                        | Graft<br>attached                         | 0.3                             | 520                              |
| 9    | 58/F        | PBK                                                        | 12                                         | Stromal<br>haze                                    | 0.78                           | 620                                 | Retained<br>DM tag                                                                                        | Graft<br>attached                         | 0.48                            | 525                              |
| 10   | 70/<br>M    | FECD with<br>pseudophakic<br>corneal<br>decompensat<br>ion | 6                                          | Stromal<br>haze                                    | 0.78                           | 625                                 | Retained<br>DM tag                                                                                        | Graft<br>attached                         | 0.18                            | 520                              |
| 11   | 65/<br>M    | PBK with<br>secondary<br>glaucoma                          | 18                                         | Severe<br>corneal<br>edema                         | 2                              | 839                                 | Retained<br>DM tag,<br>Graft fold<br>noted<br>(downward)<br>- successful<br>unfolding                     | Graft<br>attached                         | 0.18                            | 540                              |
| 12   | 45/<br>M    | PBK                                                        | 14                                         | Severe<br>corneal<br>edema                         | 1                              | 790                                 | Retained<br>DM tag                                                                                        | Graft<br>attached                         | 0.18                            | 543                              |
| 13   | 45/<br>M    | PBK                                                        | 12                                         | Severe<br>corneal<br>edema                         | 2                              | 910                                 | Missing DM<br>noted,<br>Retained                                                                          | Graft<br>attached                         | 0.3                             | 544                              |

|    |          |                                                            |    |                                                    |      |     |                                                                                                                                                      |                                             |      |     |
|----|----------|------------------------------------------------------------|----|----------------------------------------------------|------|-----|------------------------------------------------------------------------------------------------------------------------------------------------------|---------------------------------------------|------|-----|
|    |          |                                                            |    |                                                    |      |     | DM tag,<br>Orientation<br>of graft<br>when S<br>mark not<br>visible                                                                                  |                                             |      |     |
| 14 | 75/<br>M | PBK                                                        | 12 | Severe<br>corneal<br>edema                         | 2    | 890 | Surgical site<br>modified<br>due to<br>previous<br>surgical scar,<br>Retained<br>DM tag,<br>Orientation<br>of graft<br>when S<br>mark not<br>visible | Graft<br>attached                           | 0.3  | 534 |
| 15 | 50/<br>M | PBK                                                        | 12 | Severe<br>corneal<br>edema                         | 1.77 | 820 | Retained<br>DM tag                                                                                                                                   | Graft<br>attached                           | 0    | 532 |
| 16 | 60/<br>M | PBK with<br>operated<br>Trabeculecto<br>my                 | 14 | Stromal<br>haze                                    | 0.78 | 710 | Retained<br>DM tag                                                                                                                                   | Graft<br>attached                           | 0.6  | 523 |
| 17 | 66/<br>M | PBK                                                        | 18 | Severe<br>corneal<br>edema with<br>stromal<br>haze | 2    | 965 | Missing DM<br>noted,<br>Retained<br>DM tag,<br>Orientation<br>of graft<br>when S<br>mark not<br>visible                                              | Rebubbling<br>for Graft<br>detachmen<br>t   | 0.18 | 535 |
| 18 | 65/<br>M | PBK                                                        | 12 | Stromal<br>haze                                    | 0.78 | 642 | Retained<br>DM tag                                                                                                                                   | Graft<br>attached                           | 0.48 | 527 |
| 19 | 63/F     | FECD with<br>pseudophakic<br>corneal<br>decompensat<br>ion |    | Stromal<br>haze                                    | 0.78 | 620 | Retained<br>DM tag                                                                                                                                   | Graft<br>attached                           | 0.48 | 524 |
| 20 | 56/F     | Failed DSAEK                                               | 12 | Severe<br>corneal<br>edema with<br>stromal<br>haze | 2    | 845 | S mark not<br>visible                                                                                                                                | Graft<br>attached                           | 0.18 | 530 |
| 21 | 42/F     | Failed graft                                               | 12 | Severe<br>corneal<br>edema                         | 1.77 | 800 | Retained<br>DM tag                                                                                                                                   | Graft<br>attached                           | 0.6  | 520 |
| 22 | 42/F     | ICE syndrome                                               | 24 | Severe<br>corneal<br>edema                         | 2    | 910 | PAS noted<br>and released                                                                                                                            | Graft<br>attached                           | 0.3  | 550 |
| 23 | 72/F     | PBK                                                        | 18 | Severe<br>corneal<br>edema                         | 2    | 885 | Surgical site<br>modified<br>due to<br>previous<br>surgical scar,<br>Retained<br>DM tag                                                              | Rebubbling<br>for graft<br>detachmen<br>t   | 0.3  | 550 |
| 24 | 58/F     | Failed graft                                               | 18 | Severe<br>corneal<br>edema                         | 1    | 820 | Retained<br>DM tag,<br>Graft fold<br>noted<br>(upward)-<br>could not be<br>unfolded                                                                  | Peripheral<br>DM fold,<br>Graft<br>attached | 0.13 | 540 |
| 25 | 60/F     | PBK                                                        | 16 | Stromal<br>haze                                    | 0.78 | 710 | Retained<br>DM tag                                                                                                                                   | Graft<br>attached                           | 0.48 | 530 |
